# Supplementary material
Source: publisher site journal article supplement (https://www.dovepress.com/article/236122)
Supplement: Supplementary file 1 [file get_supplementary_file.php]

# Supplementary file 1. Search strategies

**MEDLINE (OVID)**

1. (Questionnaire$ or Instrument$ or Tool$ or Measure$ or Self report$ or Patient report$).tw
2. (Development or Validation or Validity).tw
3. 1 and 2
4. (medicine$ adj2 burden).tw
5. (medication adj2 burden).tw
6. (medicine$ adj2 review).tw
7. (medication adj2 experience$).tw
8. (multiple adj medication$).tw
9. (multiple adj medicine$).tw
10. polypharmacy.tw
11. (medicine$ adj2 experience$).tw
12. multimorbidity.tw
13. (multi adj morbidity).tw
14. 4 or 5 or 6 or 7 or 8 or 9 or 10 or 11 or 12 or 13
15. 3 and 14

**CINAHL/PsycINFO/SocINDEX (EBSCO)**

| S5 | S3 AND S4 |
| --- | --- |
| S4 | Polypharmacy OR Multiple N1 medication* OR Multiple N1 medicine* OR Medic* N1 review OR Medic* N2 burden OR Medic* N2 experience OR Experience* N2 medic* OR Burden* N2 medic* OR Multimorbidity OR Multi N1 morbidity |
| S3 | S1 AND S2 |
| S2 | Development OR Validation OR Validity |
| S1 | Questionnaire* OR Instrument* OR Tool* OR Measure* OR Self N1 report* OR Patient N1 report* |

**Cochrane Library**

Questionnaire* OR Instrument* OR Tool* OR Measure* OR "Self NEXT report*" OR "Patient NEXT report*" in All Text

AND

Development OR Validation OR Validity in All Text

AND

Polypharmacy OR “Multiple medication*” OR “Multiple medicine*” OR “Medic* review” OR "Medic* NEAR/2 burden" OR "Medic* NEAR/2 experience" OR "Experience* NEAR/2 medic*" OR "Burden* NEAR/2 medic*" OR Multimorbidity OR "Multi NEXT morbidity" in All Text

**Web of Science**

1. Questionnaire* OR Instrument* OR Tool* OR Measure* OR “Self report*” OR “Patient report*”
2. Development OR Validation OR Validity
3. 1 AND 2
4. Polypharmacy OR “Multiple medication*” OR “Multiple medicine*” OR “Medic* review” OR “Medic* NEAR/2 burden” OR “Medic* NEAR/2 experience” OR “Experience* NEAR/2 medic*” OR “Burden* NEAR/2 medic*” OR multimorbidity OR “Multi morbidity”
5. 3 AND 4

**Google Scholar**

development validation validity polypharmacy OR multimorbidity OR medication* OR medicine* OR "multi morbidity" "medication burden"

# Supplementary file 2. Glossary of psychometric terms

**Ceiling effects** occur when respondents’ scores cluster towards the high end (or possible upper limit) of the measure or item. The opposite is the floor effect. The problem is that variance is not measured or estimated above or below a certain level.

**Construct validity** refers to the degree to which a test measures what it claims, or purports, to be measuring.

**Content validity** refers to the extent to which a measure represents all facets of a given construct.

**Convergent validity** refers to the degree to which two measures of constructs that theoretically should be related, are in fact related.

**Criterion validity** refers to the extent to which a measure is related to an outcome that is measured at the same time (concurrent validity) or at a later time (predictive validity).

**Cronbach’s alpha:** ≥0.80 indicates good internal consistency.

**Discriminant validity** refers to whether concepts or measurements that are not supposed to be related are actually unrelated.

**Intraclass correlation coefficients:** ≥0.75 indicates good stability.

**Inter-item, item-to-total or inter-scale correlations:** Absence of extremes values <0.10 and >0.90 indicates absence of redundancy and thus good internal consistency.

**Internal consistency** refers to whether several items that propose to measure the same general construct produce similar scores.

**Known-groups validity** (or extreme-groups validity) refers to when a measure can discriminate between two or more groups known to differ on the variable of interest.

**Percentage agreement:** Higher % indicate higher level of agreement.

**Scale analysis** refers to a set of exploratory and confirmatory analyses, used for item reduction and investigation and confirmation of the dimensionality (constructs) of a measure.

**Stability or test-retest reliability** refers to the closeness of the agreement between the results of successive measurements of the same measure, carried out under the same conditions of measurement.

**Test-retest mean differences:** Absence of significant differences indicates good stability.

# Supplementary file 3. Access links to 12 reviewed PROMs

| **#** | **PROM** | **Access link** | **Availability** |
| --- | --- | --- | --- |
| 1 | Beliefs about Medicines Questionnaire (BMQ) | <https://www.tandfonline.com/doi/pdf/10.1080/08870449908407311?needAccess=true> | Horne, 1999; Author permission |
| 2 | Living with Medicines Questionnaire v1 (LMQ-1) | <https://link.springer.com/content/pdf/10.1007%2Fs11096-014-9970-5.pdf> <https://www.pcne.org/upload/files/79_Carter_oral_2015.pdf> | Krska, 2017 (view only); Author permission |
| 3 | Living with Medicines Questionnaire v2 (LMQ-2) | <https://www.ncbi.nlm.nih.gov/pubmed/28405159> | Krska, 2017 (view only); Author permission |
| 4 | Living with Medicines Questionnaire v3 (LMQ3) | <https://www.ncbi.nlm.nih.gov/pmc/articles/PMC5978458/> | Katusiime, 2018 (view only); Author permission |
| 5 | Medication Use Problems Questionnaire (MedUseQ) | <https://www.ncbi.nlm.nih.gov/pubmed/29656678> | Berman, 2018 (view only); Author permission; <https://www.cje.net/research-education/lsri/meduseq> |
| 6 | Medication-related Burden Quality of Life (MRB-QoL) | <https://www.ncbi.nlm.nih.gov/pubmed/29330175> | Available from first author with permission: [mmoh2116@uni.sydney.edu.au](mailto:mmoh2116@uni.sydney.edu.au) or [timothy.chen@sydney.edu.au](mailto:timothy.chen@sydney.edu.au) |
| 7 | Patients’ attitudes towards deprescribing (PATD) | <https://link.springer.com/content/pdf/10.1007%2Fs11096-012-9704-5.pdf> | Reeve, 2013 (view only); Author permission |
| 8 | Patient Experience with Treatment and Self-management (PETS) | <https://www.ncbi.nlm.nih.gov/pubmed/27566732> | Eton, 2017 (view only - appendix); Author permission |
| 9 | Patient Perceptions of Deprescribing Questionnaire (PPDQ) | <https://www.ncbi.nlm.nih.gov/pubmed/27579916> | Linsky, 2017; Author permission |
| 10 | Revised Patients' Attitudes towards Deprescribing (rPATD) | <https://www.ncbi.nlm.nih.gov/pubmed/27785734> | Reeve, 2016 (view only); Author permission |
| 11 | Treatment satisfaction questionnaire for medication v1 (TSQM v1) | <https://hqlo.biomedcentral.com/track/pdf/10.1186/1477-7525-2-12> | PROQOLID and IQVIA (permission); Atkinson, 2005 (view only) |
| 12 | Treatment satisfaction questionnaire for medication v2 (TSQM v2) | <https://www.sciencedirect.com/science/article/pii/S1098301510604858> | PROQOLID and IQVIA (permission); Atkinson, 2005 (view only) |

# Supplementary file 4. Themes, sub-themes and representative quotes.

| **Theme** | **Sub-theme** | **Representative quotes** |
| --- | --- | --- |
| Experiences with using multiple medicines – Emerging PROs  (Theme 1) | Social pressure, embarrassment and stigma | *“I don’t tell people I take medication, because I don’t want them to know. […] …because there’s a lot of shame, a lot of stigma, and I would rather not hear other people’s opinions on what I decide to do to manage my own healthcare. […] And getting that around other people is quite difficult sometimes, particularly at airports, it’s a complete nightmare. […] If I decide to take premazepam because it’s a controlled medication, they’re like, do you have a prescription… It’s, like, yes, but I don’t really want to get this out in front of everyone.” MEMBER OF PUBLIC-01*  *“I think it can be quite embarrassing at times when you’re taking nine [medicines], you know I feel, kind of, a sense of unease now and again if I’m out and I’m taking that amount of tablets. Especially if I’ve got any of the grandkids with me. I feel, you know, I just feel uneasy.” MEMBER OF PUBLIC-06*  *I have family who are telling me that I shouldn’t be taking so many […] it’s something that people see you taking a fairly large amount of tablets, and their attitude’s, oh. And I think that’s where the social aspect comes into play, if you can get that from your own family. MEMBER OF PUBLIC-06*  *“…coming from a South Asian community, and there’s a lot of stigma around medication use and the impact South Asian doctors place on prescribing medication and trying to give holistic therapies and other alternative measures.” MEMBER OF PUBLIC-08*  *“Normally, they say have you had this before and you say, yes, but you don’t really want to discuss your medication in front of 20 in Boots waiting. […] …the attitudes. Well, I’m on quetiapine on and off for years but it’s only 50 milligrams or 100, and people automatically think you’re psychotic because it’s an antipsychotic. But it’s more for the PTSD and the memories and flashbacks and to get to sleep at night. [So, it’s about people’s perceptions…] And even healthcare professionals.” MEMBER OF PUBLIC-10* |
|  | Navigating the prescribing system | *“I think it’s a particular problem if you’re under multiple different teams… […] different teams need to actually communicate with each other. Because, I think I’m actually pretty good at advocating for myself, but it’s incredibly frustrating when people won’t listen, particularly in primary care.” MEMBER OF PUBLIC-01*  *“I think probably the main problem I’ve encountered is that in terms of the mental health medications there still seems to be a big divide between what services will deal with what. […] I suppose healthcare professionals can become a bit complacent as well, like oh, someone’s been on this medication, don’t really want to touch it, don’t really want to do this, it’s like well, yeah, that’s great, but if I’m in hospital that probably means the meds isn’t working so well so you’re probably better off changing it, rather than just sticking with something because someone’s prescribed it.” MEMBER OF PUBLIC-04*  *“…and none of them [healthcare professionals] seem to communicate. […] It’s really frustrating. […] And I’ve screamed at my doctor I just want you to look and work together. […] I don’t know why there’s not a system in place where […] they can all communicate and look at the body as a whole rather than separate departments for separate individual conditions. […] It just feels all very separated and disjointed and you’re already going through enough. […] So, if there’s a way or if your research is going to help steer a more jointed sort of collaboration, that would be a good thing.” MEMBER OF PUBLIC-10*  *“I think it's very confusing [taking multiple medications]. I think particularly for older people often these are legacy drugs that people have sometimes been prescribed for decades and the indications of some of these medications is often very unclear. You know, you're trying to look at medication and work out what this medication is for and they can't remember.” HCP-05*  *“A big issue we’re finding at the minute is there’s so many different prescribers, and so they’ve got nurses, pharmacists, GPs, all prescribing. And what that means is that the person is getting better care ‘cause they’re being seen by prescribers, but also there’s a considerable amount of changes in their medicine regime which is what they find most difficult in understanding the stopping and starting of different medicines.” HCP-07*  *“And equally, making sure that we communicate well between primary and secondary care, about changes to…we’re often very wary of making any changes to medication regimes in secondary care.” HCP-11* |
|  | Multiple medicines, side effects and interactions: number v. impact | *“…some medications have more of an impact than others in terms of side effects. So, if someone is taking three medications, those could be three medications that are quite side effect heavy. Whereas, somebody else could be taking ten medications, none of which actually interact particularly.” MEMBER OF PUBLIC-01*  *“…medicines that are quite high [in dosage] and that [have] a lot of potential side effects. […] I guess it’s just maybe the fear that you might get very serious side effects and that it might make your condition worse…” MEMBER OF PUBLIC-03*  *“So, I think these difficulties vary from person to person, but some of it may be taking medication for others, it may be about how medications might be affecting their everyday life. Yeah, so I think as I talked about the difficulties are that there’s a lot of side effects from taking these medications, so that creates an impact on whether the person is able to function or not, with the chronic conditions they suffer with. Therefore, it makes it extremely difficult for them to function in everyday life...” MEMBER OF PUBLIC-08*  *“You get a phone call to say come pick up this new prescription and you’re left lost. And some of them can make you feel really sick. Even just now, I’ve got a very dry mouth. Nightmares can be horrendous. The worst example is the one I told you where I end up hospital because of the drug induced hepatitis...” MEMBER OF PUBLIC-10*  *“There are some people that run into potential problems with side-effects from the medicines, and one of the difficulties, if you're on many different medicines, is to try and work out which medicine might be causing the side-effect, or the adverse reaction.” HCP-01*  *“…people being acutely unwell to review their medication. And usually when you, kind of, sow that seed with people, they will often, you know, confirm that their suspicions, that they’re not actually that happy about the amount of medicines they’re taking. And that they had wondered themselves whether one of them, you know, might be causing the problems.” HCP-02*  *“…because the patient has judiciously continued to take all their medicines so well, despite the fact they’re really sick, suddenly we’re in a pickle where they’re making themselves far more unwell by taking all these nasty poisons than if they’d bothered just to stop them. So yeah, they don’t tend to cope well with the volumes of medications they’re being asked to take, they don’t always understand it.” HCP-03*  *“…the practical aspect of trying to take them all [the medicines] and having anxiety about how they're all going to interact and, you know, whether that reduces the effectiveness of some of the others, and problems they might be…how medications affect their everyday lives. I think that's probably true as well. […] I think there's a slight sense of dis-ease with more medication.” HCP-05*  *“So, there are success stories where the patient engages but I think there’s too much of an acceptance of illness and…especially in those deprived areas. I think it’s the…it’s sad. It’s very, very sad, I think it’s just the hopelessness in their lives and they’re just looking for the miracle tablet that’ll make them feel better, make them lose weight, make their pain go away. And so there’s…they turn a blind eye to the side effects, I think, that these tablets are causing them.” HCP-08* |
|  | Managing (with) medicines on a day-to-day basis | *“I guess more so managing [the different medicines], ‘cause I take three different medicines, and sometimes it can be a bit much to take all three in one go.” MEMBER OF PUBLIC-03*  *“…But I’ve got one of those rainbow colored boxes for seven days of the week […] otherwise I might struggle to remember to take them. But I get some help from my partner as well, he’s usually pretty good at keeping an eye on medication and making sure things are where they should be. […] …I had to take five of those tablets a day. I’ll take them but it’s a massive pain. And during this last hospital admission they changed it around a bit […]. That makes such a massive difference in my willingness if you will to take the medication…” MEMBER OF PUBLIC-04*  *“Monitoring and adherence […] I have experience of that in terms of overdoses of medications. So, the way we managed that was my boyfriend taking my meds to work and just leaving me enough for the day at home or something like that. But I think that was a management just on our side rather than involving services.” MEMBER OF PUBLIC-04*  *“Because you take them all together, so […] you’re very restricted. You have to know half an hour in advance that you’re going to eat. Which means that you can’t be…you can’t do things on spec. You can’t go out and decide to go for a meal if you haven’t got your tablets with you, because you know that you’re going to pay for it later on in the day. That’s why they end up in my bag all the time, because […] that’s the only way I’ve got freedom. I think it’s the spontaneity that life sometimes allows you, the tablets take that slightly away.” MEMBER OF PUBLIC-06*  *“I think managing medications is one of the concerns, without the health care support workers, if we never had them, or the carers, then we wouldn’t be able to keep a thorough account. It would be very difficult to manage it, we’d have to divide our plan in place, like, my brother spends this much hours, and I spend this much hours out of the day to prescribe the medication.” MEMBER OF PUBLIC-08*  *“…even the presentation of the drugs can have an effect and it can mix you up. And I thought, oh, god, I wasn’t supposed to take that, but it looks like another one.” MEMBER OF PUBLIC-10*  *“…Because another two pills are very similar […] But it's actually quite hard to tell, if you had bad eye sight you could make a mistake. And when you're taking quite a few pills it becomes difficult.” MEMBER OF PUBLIC-12*  *“…if you go on holiday, you have to make sure you have enough [medicines] before you go. […] So, I have to be really, really careful when I'm going on holiday that I haven't run out of anything that I might need on holiday… […] And that is a burden. MEMBER OF PUBLIC-12*  *“And then some practical things […] when to take the medicine […] …when you're fasting, others are better to be taken with food, some medicines should be spaced out. And that can become quite confusing for people, and it becomes even more confusing when people have dosette boxes. […] …one of the difficulties with that is that, the person then becomes less aware of what the pill is for, because it's just a red pill that’s taken at lunchtime. But it doesn’t have the box with the information, you know, about the pill, beside it.” HCP-01*  *“I think a little bit to worry about is getting organized and having holidays or missing medication or organizing dosette boxes. So, I think it causes the families a lot of anxiety, particularly for older people living alone with cognitive impairment or dementia. […] So, it does cause families quite a lot of anxiety when they're suddenly responsible for it as well. […] I don’t think we often help people enough with that, or they're just anxious about the timing of it. […] I think giving people more autonomy and the ability to ask about all of that…” HCP-05*  *“…difficulties vary from people to people […] Sometimes it’s the burden of trying to work out what tablet to take when. Sometimes because of the way the medicines work, they will struggle with balancing their lifestyle […]. People sometimes experience side-effects […] or maybe their symptoms aren’t as well-controlled as they would like for their day to day life… […] People also talk about not wanting to be on medicines and non-medicines alternatives. People also will talk about things that they may have bought themselves, tried themselves, recommended by a friend and had that fit into the context of what they’re already taking...” […] HCP-06*  *“There’s the management of it that’s hard. Obviously, they find it very difficult. That’s the main one and you can speak about that forever. […] I think that’s a big barrier for a lot of my people that I meet who are living in their own homes still, is like a sustainable idea of how they’re going to get these medications... […] Because again, remote and rural, you’re talking maybe ten miles, 15 miles from […] the pharmacy in some cases. HCP-07*  *“…the clinic I run is in a socially deprived area and I have been surprised at how little non-compliance I have witnessed. […] but I have to say that in the vast majority of cases, they […] maybe not know […] what their tablets are for… […] So patients, they do get in to a routine and, sort of, like…there’s an acceptance that that’s their everyday life that…you know, revolves around tablets. Quite rightly or wrongly, I don’t know. […] [And patients] are quite reluctant to change actually…” HCP-08*  *“Definitely, it's getting harder, it's not easier [taking multiple medications]. And so many medications will have to be taken without an hour of food, or on a completely empty stomach… […] It's no wonder we have the medication errors, and misdemeanors that we do. HCP-11* |
|  | Getting to know your medicines | *“…what is this being given for, how long is it going to be given for, what are the side effects, what are the benefits, and if it doesn’t work what can I do. I think people need to be very clear on that from the outset, and sometimes I think with medication it’s easy for people to give it, because it makes them feel like they’re doing something rather than nothing. But, I think, after it does need to be quite carefully monitored…” MEMBER OF PUBLIC-01*  *“I worry about the side-effects, so we talk about that, we talk about the dosage, we talk about…she doesn’t put tablets up or down without, you know, we consult. […] The side-effects as I say, we work through everything before. […] I’m terrible for going away and looking up, looking online. […] I’ll go home and have a look and see what the counter-indications, or contra-indications are.” MEMBER OF PUBLIC-06*  *“I think I’ve done a bit of research, myself, otherwise, from judgement and observation, I notice my mum, at times, was getting worse, so then I thought, maybe it’s her medication… […] I do a bit of research myself online, in terms of assessing the side effects and the potential damages […] then also consult the doctor and ask them, but it’s always like, the general practitioner has a different account of the medication they prescribe. They say the side effects, but they don’t clearly explain to the carers or to the patient what are the side effects from taking the medication, so that’s a concern.” MEMBER OF PUBLIC-08*  *“…when you're taking a few pills you have to be clear about when you take them and how you take them and whether it's before meals or after meals. […] Because the requirements of the pills may be very different and you have to get to know that, and if they're going to be of any use to you, you have to take them as directed.” MEMBER OF PUBLIC-12*  *“I have patients who report that they have difficulty understanding what the medication is for, and why they're supposed to be taking it. […] Not being that clear about the instructions for the medicines, or the requirement for the medicines […]. There's, some people are unclear about how long they should be on a medicine for, or about whether or not a medicine is essential, or just recommended. […] what are the risks of not taking the medicine, do I need to be on this medicine, or not. […] …also, people being unclear about, is this a medicine I need to take for a short period of time, or for the rest of my life. So, maybe a poor understanding about the duration of the medicine.” HCP-01*  *“…in general it’s disappointing that the significant proportion of patients don’t understand why they’re taking all the medications, and they certainly significantly underestimate the benefits of those medications, so there is a variability of that degree of health literacy there. […] [what is] key for me in unpicking polypharmacy […] would be that that we have to make sure that patients understand the value of the medicines, why they own them, what is the intended benefit. And if you can get that across to the patients, and they can understand that, that will help enable those conversations…” HCP-03*  *“…I think that comes down to a patient, or, you know, patient level of expectation. Most people take medicines and don’t really question them. We don’t have a culture of questioning healthcare professionals about what this is or how it works. […]” HCP-05*  *“I think the main focus is really about appropriateness or not appropriateness when someone’s taking more medicines than they need to, but they’re not going to get benefit from or might do them harm. […] I suppose what we’re trying to find out is the effectiveness of the medicines […] And patients sometimes have very set beliefs about the way tablets work […] that they don’t want to use medicines in case they become used to it and they won’t work when they need them to work. […] Sometimes people have fixed ideas, they’ve decided that they want a particular type of medicine because they’ve maybe tried it or someone else […] So, I think just being clear by what we mean by effectiveness […] because I think that’s open to interpretation.” HCP-06*  *“…I think what we have to maybe accept and include in there is that some patients don’t want to know, they don’t want to make any decisions, but I think it’s important to ask that question, do you understand what your medicines are for, and how they benefit you I think might be something.” HCP-06*  *“I suppose the other main side of it is the satisfaction of the prescribed medicine. So, a lot of the patients either don’t know what they’re taking the medicine for or disagree with how effective it actually is anyway. So, there’s a general disbelief…” HCP-07*  *“…’cause there is polypharmacy especially in socially deprived areas for younger patients […] And what I found in that patient cohort is broadly speaking [dealing with] polypharmacy really wasn’t as successful because the younger patient tends to want fixed by a tablet. […] they’re in a mindset that they’ll get the tablets to fix it. It’s out with their responsibility. So, to try and turn that round […] I found that patient group very, very difficult. […] because they want the answer in a tablet. […] it’s very hard to take the tablet away.” HCP-08*  *“There's that element of ownership, isn't there. [when using dosette boxes] […] It's more [of] …ease for the clinician to make us think, oh that’s safe, at least it's all in a box. When actually, if we can educate our patients…and I suppose, you’ve got patients with short-term memory loss, that kind of stuff… […] and then have, rely on carers. So, it's not one size fits all, is it.” HCP-11* |
|  | Getting off medicines | *“Patient’s interest and willingness to continue prescribed medicine. I think I’ve had good experiences with that because I wanted to start ticking meds off my list and I talked about that with my community consultant and he was like okay, yeah, but you can take things slow […]. I know that I can’t just stop these medications overnight. But he was quite good in following up and we were having monthly appointments to see how things were going and how my mood was doing and that kind of stuff.” MEMBER OF PUBLIC-04*  *“...quite often, I hear a desire from people to be on less medication. And I worry that some of the medicine is causing them to feel unwell, and to cause side-effects. Which again, drives that request to reduce medicine, or to come off medicine, if at all possible.” HCP-01*  *“…they don’t normally comment directly […] but if you then discuss it they often say, I'm glad you're stopping some of my medication, I think I take too much. Or some people say, do I really need all of this medication? So, if you raise it with them they will then discuss it, but it's not something they normally raise primarily… […] It often depends on how accepting they were of the prescriptions to start off with. […] It just feels a little bit how you have that conversation about are you going to withdraw somebody on medication, but that's a good thing, rather than just saying, I'm withdrawing it because you're not worth it anymore. I think…yeah, I think you can only do that once you’ve gained someone’s confidence and they're convinced that you have their best interests at heart. […] So, I think it has to be done reasonably sensitively.” HCP-05*  *“But there is a lot of people like that that you end up falling out with because of their prescribed medicine […] It’s that we want to stop it. […] We’re speaking about patients that are on a medicine, they’re quite old, but they have faith in it. […] They’re generally not happy about stopping something that they’re happy with.” HCP-07*  *“…in [a] more socially deprived practice, the mindset is very different. So, your 75/80 year old takes the medicines, doesn’t question and only takes them because that’s what the doctor told them to do. And [they are] quite happy and sometimes relieved to hear that actually you don’t need to take this anymore…” HCP-08*  *“…you get more concern from the daughter or the son maybe about changes to medication. […] So, you might get a call from…oh they’ve been discharged from hospital and they’ve stopped this and started this, can you explain why. […] It’s more concern about changes. […] So it’s very difficult to stop medicines. And that seems to be […] a concern around stopping and changing ‘cause they get set in their ways, in my experience.” HCP-08* |
|  | Involvement and engagement in decisions about medicines | *“There’s been occasions when she’s been over ecstatic, she’s been very hyper, and we’ve been to the healthcare professional and said, this is what she’s on, and they’ve said, yeah, and without consulting us, this is the prescription, take it to your GP immediately. So, the psychiatrist makes a decision without our consent. […] Without consulting us. But, I don’t know whether they would…for the best interests of the patient, but they’re judging it on the basis of what she’s suffering with.” MEMBER OF PUBLIC-08*  *“And the doctors need to be more open to what the patients are telling them because for years it was denied [side effects linked to a specific medicine].” MEMBER OF PUBLIC-10*  *“These are everyday discussions for me, to be honest, about what are their intended perceptions of the benefits of the medications we’re prescribing. […] but I think limiting factor amongst this is not necessarily the patients’ appetite, and we often dwell on that. […] I think a lot of the limiting factor here is… time is definitely 100 per cent. I think the problem is enough time in the system, it’s just that we spend it doing other things. […] I think there is time for it, but we just get pulled into filling out forms and doing everything else we do with our time.” HCP-03*  *“So, yeah, I think prescribing medication is where you’ve got relationship. I think it should be more of a partnership rather than a prescription. […] using medication should be a joint decision and monitoring it should be done jointly rather than something like that as well.” HCP-05*  *“…patients don’t like the word adherence because they feel as if healthcare professionals are checking up on them […] so actually [it could be] do you agree… […] how do you feel about an action plan that’s developed […] it’s just really what was the action plan afterwards, and am I happy to […] what was the plan afterwards, and were they happy to sort of implement [it].” HCP-06*  *“I think for most people, what they would find is that they’re not told enough about it at the time of prescribing and so it’s that understanding that a lot of people do struggle with. […] It’s just about having a conversation about each medication and that’s why reviews are so important.” HCP-07*  *“…in my appointment, if they [patients] go away and there’s nothing changed but they understand what they’re taking and why, I think that’s still a good outcome. And certainly the patients enjoy this revelation. You know, having the time to sit and explain. […] …but nobody sat down and said, it’s doing this, it’s doing that. So, the thing is that it’s time consuming. But pharmacists have a little bit more time […] And I think it’s hard because I think at the time medication’s prescribed, there’s so much information going on for the patient…” HCP-08*  *“…but I feel I always have to say, you know, I don’t want to be accused of I’m in there to save money. That’s not what I do. […] I’m not here to stop all your medicines. I might increase doses, I might start something. And then I feel I get more engagement that way. Because, you know, they come in with the concept…they get defensive if I…they think they’re just coming in for me to take some of their medicines away. So, I find that if I explain it that way, then [I] build up trust that way, then they do engage more…” HCP-08*  *“So it's difficult, sometimes, because you’ve got your patients that are very, very well informed, and really keen to be engaged in all decisions surrounding their health care. But then, I do look after a lot of patients, that unfortunately, are not that engaged with what is happening to them. […] So, I think it's about how we have to, we have to engage with patients and carers, at a level that’s appropriate for them.” HCP-11* |
| Relevance, usability, usage and potential handlers of PROMs  (Theme 2) | Perceived relevance in clinical practice | *“…if it’s something where you have an appointment with the pharmacist, they look through it [the PROM] and they say, okay, well, here’s what we’ve got, this is potentially what might help, I’m happy to put some recommendations across to your GP. And then, you can have a discussion with your GP about which […] is the best way forward.” MEMBER OF PUBLIC-01*  *“[using PROMs] would help them [healthcare professionals] understand what it’s like for people to take regular medications.” MEMBER OF PUBLIC-03*  *“…there’s always a little bit of stress of being with a clinician I find, and trying to think under that amount of pressure. I’m like oh, I can’t remember half my meds or something. If there is that sort of standardized thing that I’ve done in advance, I guess it can make communication a bit easier. […] …if they’re asking specific questions it’s easier for someone who’s filling it in to think about individual concerns rather than trying to get them out in a clinic at the GP kind of thing, and end up leaving and you get to the car and realize oh god, I forgot to ask this and that. So, I think it would be helpful with that as well.” MEMBER OF PUBLIC-04*  *“I personally feel some patients with chronic conditions, would not be able to give an accurate account, or able to fill in a questionnaire. But if there was a relative member or carer, who could comment for them, then that’s possible.” MEMBER OF PUBLIC-08*  *“Yes, I think it [having a PROM] could be a good thing but something else that might pop in is how honest some people will be. […] Over the years, there have been drives to get certain medications down and it can be quite alarming and scary for a patient to think this is going to be taken away from me. And then it sounds like you’re an addict or something. […] …But when you do that [openly talk about problems you experience with medicines] then you’re classed as an annoyance. […] Yes, that [the PROM] will cut that out. […].” MEMBER OF PUBLIC-10*  *“Yes, absolutely, they're really important [the PROMs]. […] I think they can [be used effectively], I think they can be used, and they should be used. There are ways to use them […] to look at the most effective way to obtain patient reported outcome measures. […] what the best method is to do that.” HCP-01*  *“Yep. I think they [the PROMs] for a lot of patients would be […] a useful starting point. I mean, obviously people […] vary a lot, so it’ll be suitable for some, not for others. You know…but I think it’s a good starting point. […] I think the benefits potentially would be […] you’d have a more effective review process which would be more informed by their views. I think the disadvantage is, you know, some patients are very, I guess, anxious and it may potentially cause more anxiety if the questions weren’t phrased correctly. So, you know, I think some people will struggle with the notion that we might be thinking about stopping their medicine and whether we’re actually, sort of, writing them off. I have experienced that.” HCP-02*  *“…we need to be very honest about [medicines] intended benefit, and only then the patients understand that intended benefit can the PROMs really flourish to then understand the shared decision, what are we doing with your medications and why, and why should you stay on these medications.” HCP-03*  *“I think they [PROMs] probably do [have a place in clinical practice]. […] I think we should prescribe more using an outcome and decide whether to continue something or not. […] I think what we should probably do is agree as a healthcare provider and a patient that we’ll review this at three months or six months and see whether it's still really needed, but I don't think that happens often enough. I think it just tends to be on their repeat prescription list and it just goes on forever. […] …and that's partly just a pressure issue. I think just having time to review those types of things isn't, you know, generally easy.” HCP-05*  *“…we want to try […] and get people to take a part and [have] a role when they’re having medication reviews. […] this [having the PROM] would be an opportunity for people to provide feedback in terms of how they find the medication review from their perspective. […] does this help improve how they feel, do they feel that they’re better, and do they feel that actually the review makes a difference […] what did the patient think, was there value from their perspective […] it [the PROM] would be a nice way to try and capture a person’s perception of what they think has happened in an intervention, particularly around medication review.” HCP-06*  *“I think so, yeah, absolutely [PROMs have a place in clinical practice]. I think they’re an incredibly useful tool. I don’t know how happy the prescribers would be with them, but from a patient perspective, it’s a fantastic opportunity for people to feed back, especially family. […]. And it would give them a chance to fill this out [the PROM] and hand it back.” HCP-07*  *“…yes [PROMs have a place in clinical practice], I mean, if they got the patient…maybe I’m not asking key questions to make them think about medication burden and [the] PROM did that and I had that information before I saw the patient, I would know the mindset of the patient. And I think it would be very useful. And it might get patients thinking differently… […] …start to ask that question […] of all these medicines, which ones are helping me? […] And, which ones might be causing me harm? […] …take a bit of ownership over your medication and your treatment. […] it’s realistic medicine, it’s patient decision making. […] I do think anything that helps the professional understand the patient’s thinking and where they’re coming from will help support any sort of review.” HCP-08* |
|  | Usability aspects | *“About 20 questions long. […] It needs to be you can do it in about five minutes.” MEMBER OF PUBLIC-01*  *“As long as it’s [the PROM] not too time consuming and it gives me room to expand my answers, then I think that’s very good.” MEMBER OF PUBLIC-03*  *“I guess the other thing could be what format it comes in. So is it like a paper thing or is it an electronic thing? […] electronic, either phone or on like a web browser or a laptop, I suppose it might not work for everyone. […] I guess at the end of the day asking the person what preference they have. […] But I probably would say not longer than five minutes to fill it in I reckon. […] you don’t want it to be so quick that people just completely neglect it, but you don’t want it to be too long either. […] I suppose one get out of jail free card you could have was say is there anything else you want to be aware of or is there anything else you want to ask, and that gives a bit of free text to say if something’s not been covered.” MEMBER OF PUBLIC-04*  *“…if the questionnaire had questions where they were just very simple to understand, to read, to process, then you would get more accurate results in terms of what you were trying to find out, or determine. I think simple questions, appropriate questions about their perspective of the medication they’re taking or their condition. Just not wordy.” MEMBER OF PUBLIC-08*  *“Questionnaires I think have to be asking the right questions to get sensible answers. Because it's all about how you frame the questions. […] And they have to be meaningful I think to elicit good answers you can use. And you might find that oh my goodness, I never thought that people had this problem, and look at how many people are saying.” MEMBER OF PUBLIC-12*  *“…So I think the length has to be one that you can do it in ten minutes…” MEMBER OF PUBLIC-12*  *“…it's important that the language used is a language that’s easily understandable by people. That they're not too long, that they're easy for people to complete. […] that they ask the essential questions […] trying to tease out the really key questions, that will help us to obtain the patient reported outcomes.” HCP-01*  *“So, I think if the questionnaires are not too long and phrased in a helpful manner, they can be very useful.” HCP-02*  *“…if [the PROM] could be developed on a platform where they’re accessing the tool, it could be a tool that could be used by a wide cohort of people in order to capture how they feel the interactions are so that we can then use it for also evaluation but also improvement purposes. […] I assume that if we developed some PROMs, it involves some specialist from health literacy that would work through these questions […] so it wasn’t just wordy.” HCP-06*  *“…but it’s…you know, it’s what’s important to the patient […] …what’s the most important tablet if you were to, you know, only take three, which ones do you think are the most essential, to try and get the patient to think like that. I don’t know if your PROM takes that sort of approach or anything, but I thought that was a very clever question to ask a patient.” HCP-08*  *“…and I suppose the sense of purpose of it all about…I think if you explain to somebody why it’s being done, they’re more likely to do it, rather than, you know, just random…if they see a purpose in it, they might be more likely to complete it. But I think make it very user friendly and easily understood.” HCP-08*  *“Oh, less is more. […] …really, really long questionnaires for patients, they just get lost.” HCP-11* |
|  | Delivery, timing and frequency | *“I think that is something that really needs to be done, even if it is just a once a year type thing… [...] every six months. Or whenever there is a medication change, I think that’s reasonably appropriate.” MEMBER OF PUBLIC-01*  *“…And I guess making sure that if I’m providing this medical information that’s available to everyone involved in my care.” […] But, I suppose, if it’s a monthly occasion or something that’s fine. If it’s something that I have to do every week, then that might be something a bit different. […] So it’s trying to find that balance of how often to do it as well.” MEMBER OF PUBLIC-04*  *“Personally, I think that, you know, probably weekly would be ideal. Because very little changes from day to day. But from week to week things can change. […] So, I think weekly and maybe just keep a couple of lines to say what the issue is. […] And that then, again, it’s for you to go down armed with your wee questionnaire and go…” MEMBER OF PUBLIC-06*  *“Yes, that would be very good if you filled it [the PROM] out on a form beforehand, because lots of times, the doctors are very busy and there’s a big queue and you don’t want to take up too much of their time. So, if there’s something that you’ve already ticked or written down, then that would make a difference.” MEMBER OF PUBLIC-10*  *“I think it should be a month after each medication of it being issues, and then maybe six months but definitely with each new medication. And then if you’re on stable long-term medication, then once a year. […] Maybe with the option of requesting one or downloading one or picking up one in the doctor surgery or the chemist or self-referral or whatever it is. I think that would be a good thing. Especially old people that get their medication delivered or picked up.” MEMBER OF PUBLIC-10*  *“And I think the ideal thing for when you’re doing a comprehensive review of someone’s medication is that they’ve done a little bit of homework first and have thought, you know, about…well I suppose important question is what’s important to them in terms of, you know, what outcomes may be achievable. […] But, you know, with the understanding that it’s an ongoing process [using the PROMs]. You wouldn’t just do a one off.” HCP-02*  *“I think it [introducing PROMs] would have to be done reasonably sensitively. I think any time you try and suggest people might not need their medication you have to be very careful how you use that message. […] …if you're going to do it for everyone, including teenagers and children, then I think that's fair. Otherwise, it just looks like rationing or control of cost rather than doing anything for patients themselves. This process would be quite complex. So, for some people I think you have to do it in a fairly slow manner. I don't think it's quick and easy for older people.” HCP-05*  *“…anonymity, because there are some questions, I assume that they’re reported questions, that show relationships and communication with healthcare professionals. If [patients] decide that they’re not going to take something, so their sense of control of managing their medications, that may depend on the sensitivity of the individual how prepared they are to answer that question. […] but I think patient anonymity would be something that they would want to know was protected.” HCP-06*  *“…in terms of feedback for the actual document, I think it’s fine. I would just be skeptical, knowing health professionals, how well they’d be received […] But I suppose my concern would be for the incentives for actually complying with them [the PROMs]. [Also] the actual feedback of the feedback […] the way that they [the health professionals] would action it would be hard. But that shouldn’t be a reason for patients to not really have their say.” HCP-07*  *“I think if they [the PROMs] are delivered directly, then, yes. I think if you do something, whereby you send the patient away with it, or the carer away with it, then, no. I think it needs to be delivered face to face. […] …because you know, as a healthcare professional, we pick up on non-verbal cues.” HCP-11* |
|  | Potential handlers of PRO information | *“Personally, I really think that pharmacists need to be doing this [give out and collect PROMs]. I think there’s an awful lot of expectation only a GP or nurse can do it and, yes, they probably can, but I don’t think they’re necessarily the best people who are placed to do it. And, I know some pharmacists are supposed to do medication reviews of multiple medications, but I have never heard of that actually happening.” MEMBER OF PUBLIC-01*  *“If there was this [the PROM] in place or, like I said, a nurse who could phone or whatever, then I think it would benefit everyone all around and help the doctors and the pharmacists and the hospitals as much as it would help the patients. So, I hope that this gets implemented.” MEMBER OF PUBLIC-10*  *“I don't think you could just expect every GP to start using PROMs on a daily basis, without any thought as to, you know, the practicalities of that, or the resource of that. So, yes, they're very effective, but it needs to be planned.” HCP-01*  *“I think, I'd like to see more use made of pharmacists, particularly, community pharmacists, in the monitoring, and support of people who are on multiple medications. You know, I think community pharmacists are an underused, highly skilled resource. […] I think the community pharmacists should be leading, you know, much of this work. […] So, a way around that is by providing all GP practices with a pharmacist who is attached to the practice, who is in on a daily basis, who is doing polypharmacy reviews. HCP-01*  *“…especially in the over 70 setting, I think these patients need to be seen, either, when they’ve got complex polypharmacy, they should be seen by a pharmacist, in my opinion, who is specialized in polypharmacy, with regards to frailty, older adults.” HCP-11* |
| Most meaningful PROs for medicines reviews  (Theme 3) | Knowledge, information and communication about own medicines | *“I think in general what would be really helpful is, if before appointments people had access to information on the different options. […] It’s like, can we actually talk about this, or can I do some research on it first, but there isn’t really that opportunity. […] …and if you’re willing to look it up [the side effect] yourself you can find out about it, but people need to have access to accurate information. […] So, I think having open and honest conversations about that is really important. And, I think a lot of this comes down through trying to get people who work in healthcare to be less paternalistic, and to actually realize that their patients have something important to tell them. […] …let’s have a collaborative conversation about how we can improve things together. And, I know that’s in lots of documents, but I don’t think it actually happens.” MEMBER OF PUBLIC-01*  *“…if I did not [have access to information about medicines] then I might just be googling it and who knows what might come out of that. You never really know. […] So I think it would be helpful if a new medication is being started make sure the patient is happy with it and if they have any concerns make sure that I know who I can report them to and how I can reach that person. […] …if you’re being involved in the decision I guess it gives you some ownership as well for your own health. […] And I’ve met people while being a patient, some people want to know a lot about their medication like I want to know about my medication, but actually I’ve met people that don’t really want to […] But having that question would from the outset make sure you’re giving the right level of information depending on what they want.” MEMBER OF PUBLIC-04*  *“The understanding of how the medication works. […] That’s a big one, because my reaction to codeine was such it landed me in hospital twice. Very extreme. [...] And that would have been useful if I’d known what I thought I was having a panic attack… […] Nobody mentioned anything about, you know, there may be on very rare occasions […] But it doesn’t matter how rare a medication’s side-effect is, if it happens to one person, you should know about that.” MEMBER OF PUBLIC-06*  *“…patient’s knowledge about medicines, and understanding the medicines, need for information. So, if a questionnaire had a question about different medication, about depression, and its use and the side effects, then it would make the patient more aware of the medication they’re taking, and how appropriate it is, so that’s one of the points. […] [And] as a son I want to be aware of what the side effects my mother is suffering with, or what she might experience from taking the medication.” MEMBER OF PUBLIC-08*  *“The communication with healthcare professionals about medicine is lacking. Like I said, if there was a nurse or a doctor or whoever that could liaise with healthcare professionals, then that would be helpful because you can have lots of questions about the medication or how it’s making you feel, and you phone up and then it’s two weeks to see someone. And you might just stop taking the medication, and then that could have a negative effect on your illness. […] People need to be a lot more pragmatic as well. People need […] not just accept what they’ve been given and maybe do some research of their own or be more forthright with problems they’re having.” MEMBER OF PUBLIC-10*  *“I do know what my medication does, but I don't know if other people are interested in knowing that. […] Relation and communication with health professionals. I think you so rely on the doctor. And if you have a good relationship with the doctor, I think that makes an awful difference. And I think probably the communication with healthcare professionals about your medicine is an important one, because I think you have to be involved in that conversations about what they're going to give you.” MEMBER OF PUBLIC-12*  *“I'd be interested, particularly, in their beliefs about why they're taking the medication. […] concerns about potential side-effects.” HCP-01*  *“I think from my perspective, it’s not about that, it’s about whatever medication you are taking, you should understand the intended benefit of them, and be making an informed choice to be on them for whatever that intended benefit is. […] I think it’s driven by making sure that people are understanding why they’re on the medications and making sure they’re making best use of them. […] …the strapline that I use […] is value your medicines […] it’s not value the spend that we make, it’s understand why are we giving you them and what are you taking them for, and patients kind of understand that. […] That’s all we’re asking them to do, to value their medicines, and I think that encompasses a lot of those things. […] We must improve that health literacy to say, why are you taking them, because if you understand why you’re taking them, your attitudes, your monitoring your adherence, everything will be sorted out, I think.” HCP-03*  *“I think the relationship or communication with healthcare professionals about medicines including involvement with decision making. […] …if patients took a more active role and are seen as more equal partners in their medication, you know, rather than just be passive in it.” HCP-05*  *“…Yeah, I think that’s a good idea, you know, did the person involve me in their view or did they really just talk at me, I think that’s probably important. So, people think that they’re doing these things, but they don’t always. […] …relationship and communication of healthcare professionals in the decision-making. […] Patients’ knowledge about medicines and/or understanding of medicines…” HCP-06*  *“…the way forward is shared patient decision making. But sometimes that is inappropriate. You do need the expert to tell you. […] …it’ll be interesting to see patient’s concepts of [whether] they feel equipped to [be involved in] shared decision making, do they feel confident and informed enough to be involved in shared decision making? […] how much is somebody taking in in one sitting and how long are we giving them to think about it and discuss with relatives… […] I’m sure you’ll get a split view. Some will just want to be told what’s right and some want to share the decision making… […] I think the simple question, do you know what all your medicines are for?” HCP-08*  *“Patient’s knowledge about medicines and/or understanding of medicines, need for information. […] We prescribe way too much medicines, so that for me is the key, it's one of the things that really worries me.” HCP-11* |
|  | Perceptions, views and attitudes about (own) medicines | *“I think the patient’s perceptions of the effectiveness of prescribed medications, I think that’s really important. And, I think it’s very often undervalued and doesn’t really happen every much, particularly if there isn’t access to alternatives. […] …general satisfaction with prescribed medications, yes, that comes up. […] And, I guess, maybe general views, attitudes and perceptions, and particularly societal perceptions. Because, I took antipsychotics for a while… […] No one really talks about the stigma associated with that, and I guess it’s very hard at a pharmacy if you say, can I have this medication, and they’re, like, can you say that a bit louder please. It’s, like, I actually don’t want to, because you’re always concerned about who can hear you or who is around you, but no one mentions that.” MEMBER OF PUBLIC-01*  *“And, I think, if questionnaires are measuring this and it turns out that people’s family or friends are having a major impact on their decision to take or not take certain medications, that can, kind of, indicate that there might be a need for education around it. […] …I think, if people are taking multiple different medications […] but influenced by other people’s perceptions about what they should be taking, that needs to be taken into account. You have people that do this in, like, a vacuum.” MEMBER OF PUBLIC-01*  *“Effectiveness. […] I want to know, like, if it’s actually working or whether that is actually benefitting me in the long run.” MEMBER OF PUBLIC-03*  *“I suppose the effectiveness [would be one of the most important PROs]. I need to know what’s the point, will it work?” […]…that’s difficult because I am under a lot of pressure to start to come down off some of these medications. Not by the doctor, but by my family. […] And I’m kind of glad that they don’t have any rights over me or how I take my tablets, or how I take my medication.” MEMBER OF PUBLIC-06*  *“The other point could be, general satisfaction with prescribed medicines, so if a question in the questionnaire asked how satisfied are you with taking an antidepressant, then the patient could comment on how satisfied they were. […] And general views and attitudes, beliefs and perceptions about medicines.” MEMBER OF PUBLIC-08*  *“Well, I think the concerns about medicines overall, that one. The appropriateness of medicines. That I think for me is important that you're not taking things needlessly and they are for whatever condition you have. That, that's as good as you can get. […] General attitudes, beliefs, perceptions. I think that possibly is a one where you definitely have views. And there's so much information swelling around nowadays that you…people think they know more than the doctor. […] So, there are a lot of attitudes and beliefs that are not so good at times. And I don't know how you assess that and question use. But you would need to ask the right questions.” MEMBER OF PUBLIC-12*  *“I think, the effectiveness, the first one […]. Their views and attitudes is important. […] And about any concerns that they have around the medication.” HCP-01*  *“I guess what’s, kind of, missing is what they want to achieve. I can’t really see that on…from that list. So that’s maybe missing from the literature at the moment. […] Effectiveness is an interesting one. I think it depends on again what the purpose of the medicine is, so if it’s managing symptoms, obviously you want it to manage those symptoms. […] A lot of the medicines we use obviously are trying to improve longer term outcomes for populations, so they’re, sort of, managing risk. […] The patient may believe that that is benefitting them as an individual. But we know actually the chances of it…of that medicine benefitting that individual is low, it’s more then as a part of a population will derive the benefit. […] So, we don’t often have those conversations with patients, but I guess that’s, kind of, what we would hope to do for more patient centered care. [And] I suppose the self-confidence mixed in with a bit of what their views and attitudes are. …those probably would be the highlights for me.” HCP-02*  *“…attitudes and beliefs and, or perceptions about medications, perceptions of effectiveness…I still think that’s really important. […] The one that I think just now doesn’t come up that we’re not explicit about is about their perception of effectiveness, that first one. […] …what is the intended benefit to you, because that’s the springboard for all the conversation that comes afterwards… […] What’s the effect on this and what is the intended benefit for you, how does that sit with your own values and your own aims… […] …unnecessary medications as well […] are they aware that any of them are unnecessary? […] do they think that they need them all? That is quite a common thing, actually, with patients’ medicine, they say, I don’t know if I need all these, or are these all absolutely necessary? That does often come out. Do you think it’s necessary to stay on this medicine? I think that’s a reasonable question.” HCP-03*  *“…relationship and communication of healthcare professionals in the decision-making. Which sort of brings in the patients’ perceptions of the healthcare professionals’ intention to prescribe medicines. […] patients’ perception of effectiveness of their prescribed medications […] Their general views and attitudes about their medicines.” HCP-06*  *“…are you satisfied with your prescribed medicines? …and, are you happy taking the number of medicines that you are taking? […] General views, attitudes, beliefs and perceptions about medicines. That would be useful to know. As I said, the younger population tend to want the answer in a tablet, tend to want it fixed by a tablet, tend to not see their contribution to their poor health. Which is sad. Very, very sad.” HCP-08* |
|  | Impact on daily living: Side effects and practicalities | *“I think people need to be honest about the side effects. I think this is why often people cover up some of these things… […] …side effects, I think that’s important because it’s very much overlooked. Or, one thing, actually, I haven’t mentioned this, if people get side effects then people add in another medication to deal with the side effects.” MEMBER OF PUBLIC-01*  *“I think the availability and accessibility of therapy and medications is definitely something that needs to be raised. […] I know a lot of people actually don’t pay for it because they’re on some kind of benefits, but if you’re not you do pay for it, and no one ever, ever talks to you about this. […] Availability and accessibility purely from a, kind of, cost and how easy it is to actually get hold of the medications. Like I mentioned, if your own pharmacy has difficulties, you don’t necessarily want to mention it in front of people.” MEMBER OF PUBLIC-01*  *“And I guess the concerns is an umbrella one, it covers a lot of other little ones as well. So stuff like side effects could easily be drawn into the concerns or medication adherence could easily be brought into that as well. […] On the practical level, I think for me the other two key ones would be the practicalities and the impact on daily living. I think they’re quite pragmatic […] Because I’m not working […] it’s not tragic to take meds three or four times a day, but if I was working full time actually it would be really awkward. […] I guess that sort of question would make sure that what you’re being given fits in with your lifestyle as well.” MEMBER OF PUBLIC-04*  *“I would like to know how to report a problem with medication. And I think that’s definitely, for me, that’s number one. Impact on your daily living, yeah. […] …side-effects. […] the impact on daily living would be important, because I’m not so sure that if I’d known how bad the impact was, whether I’d have been so keen. […] Self-confidence in managing, I’m self-confident managing the medication now, not before, because there was just too much medication to be taken at different times in the day, and it confused me completely.” MEMBER OF PUBLIC-06*  *“The impact on daily living due to medicine use, I would want to find out what that impact is on her daily living, and what the medication is doing to her so we can assess that.” MEMBER OF PUBLIC-08*  *“And the other one to me would be side effects, because that is a thing that concerns me at the moment when I'm taking steroids for such a long time. […] So, side effects are a problem for me and the concerns about medicines.” MEMBER OF PUBLIC-12*  *“…side-effects are important. […] Practical things, yeah, such as availability and accessibility.” HCP-01*  *“…the issue around side effects is clearly important. […] in my current clinical practice, that’s probably…is my starting point. […] Practicalities are clearly important. […] I quite like the self-confidence thing because that almost hits on the…what’s important to them [the patients]. […] …Probably quite important and, you know, maybe we don’t try and bring that out in a review as much as we should. I suppose that’s about how at ease they feel about their medication and how worthwhile it is for them as well. So, that’s quite a good one to pull out, I would have thought. […] If I were to pick out some again… focus on side effects, impact on daily living… […] I think they would be the best starting point to identify if there are any issues.” HCP-02*  *“Side effects, patients tend to report that anyway. If they were to go out of their way to communicate to me about an issue… […] self-confidence… I think they’re all important. […] Side effects, absolutely. […] So, if we understand the value of it and then there’s adverse effects, the intended benefits and then the kind of compliance concordance issues for me are quite important, especially when it comes to the polypharmacy stuff, how are they managing that volume of medications and are they managing that volume of medications.” HCP-03*  *“Because I think the other one that strikes me, the family sense of control, autonomous or confidence in managing medications… […] …the impact on daily life.” HCP-05*  *“…the availability and accessibility of the medicines. And I think that with Brexit, that’s going to be something […] we’re all not looking forward to […] So that’s somebody that needs the medicine, but we don’t have it in stock...” HCP-07*  *“Do you think you’re experiencing side effects? […] I think impact on daily living. You know, the tablet burden, a medication burden that you talk about. I think that would be useful. […] …Unless…you know, I could be asking the wrong questions, but I don’t get a lot of complaints about tablet burden. …most of them are very immobile. It’s part of their daily routine, what keeps them busy. If they didn’t have the tablets to take, they would have nothing to do. [But that] would be really useful to know and to see that type of PROM on impact on daily living, ‘cause that is something I’m not asking the right questions about.” HCP-08* |
|  | Medicine usage: “as planned” use, misuse, abuse, no use | *“The one thing I would say is, issues around regular medication follow-up, medication monitoring, adherence and medicine abuse, like, medication abuse […] Someone prescribed me 200 [medicine name] tablets at once. […] There is no reason for me to have that much. But, I guess, it was easier to do it all at once and it’s, like, if I was abusing this, which I’m not, it would be so easy. […] And, I still have a lot of different medications, because I have them left over from various different things. I know you’re meant to take them back to the pharmacy, but I don’t do that. And I know that if I wanted to abuse them, I could; if I wanted to sell them, I could, but I don’t.” MEMBER OF PUBLIC-01*  *“And I think that prescribed medications can be abused without the person [knowing] they’re abusing it. […] So, they think they’re doing…but they haven’t told you that there’s a risk of becoming addicted. So, the more times you’re down and it’s just a case of a repeat prescription, and nobody’s keeping an eye on what’s going on, so people end up…and I know I did misuse that, I just took it because I needed it. You know, and not for the reason that it was prescribed, but because it was there, it was mine…” MEMBER OF PUBLIC-06*  *“...issues around medical follow up […] attempt to discontinue, because you can have an idea […] from two perspectives. One from a doctor’s perspective saying, right, okay, we need to start reducing this tablet. And your own perspective saying, oh no you don’t. You know, there needs to be that communication between…” MEMBER OF PUBLIC-06*  *“I realized that there’s a lot of GPs that are overworked and there’s not enough funding and there are not enough GPs to go around everyone, and they’ve got 10 other people waiting in the waiting room. So, maybe they can’t give their full attention to prescribe drugs, but I think it’s really important that they should, and it will avoid incidences of me getting hepatitis or whatever it’s called because you’re not supposed to take these two drugs together.” MEMBER OF PUBLIC-10*  *“Issues around medical follow-up, risk of misuse or abuse. Well, I suppose it's a thing that you get so used to taking your medication, you don't question whether the dose should be different or if it's the right medication now that maybe things have changed. I think that's possibly an area that could be improved. Because you just continue to take medication and you don't know whether you need to be taking it or not […] whether the dose needs changed or reduced or whatever.” MEMBER OF PUBLIC-12*  *“I think monitoring and adherence…I think my experience is that clinicians are more bothered about that than the patients […] I guess that’s important to us, less so to the patient really.” HCP-02*  *“I think there’s then like a kind of grouping of kind of compliance concordance type stuff, the monitoring adherence practicality stuff…” HCP-03*  *“I think the…you know, simple question… […] do you struggle with compliance? […] So it can help you target patients that want to make sure that they’re on the…the doses are optimised and that they’re on all the right medication. HCP-08* |

**Abbreviations:** MP, member of the public; HCP, healthcare professional; PTSD, post-traumatic stress disorder; PROs, patient-reported outcomes; PROM(s), patient-reported outcome measure(s); GP(s), general practitioner(s).
